# Supplementary material for: CO2 Hydrogenation: Na Doping Promotes CO and Hydrocarbon Formation over Ru/m-ZrO2 at Elevated Pressures in Gas Phase Media
Source: Nanomaterials (Basel). 2023 Mar 24;13(7):1155. doi: 10.3390/nano13071155 (PMC10096969; doi:10.3390/nano13071155)
Supplement: Supplementary file 1 [file nanomaterials-13-01155-s001.zip › nanomaterials-2280858-supplementary.pdf]

**Table S1:** BET surface area, specific volume, and average pore diameter.

| Sample ID                      | Measured<br>A <sub>s</sub> (BET)<br>(m <sup>2</sup> /g) | Expected<br>A <sub>s</sub> (BET)<br>(m <sup>2</sup> /g) | V <sub>p</sub> (BJH<br>Des)<br>(cm <sup>3</sup> /g) | D <sub>p</sub> (BJH Des)<br>(nm) |
|--------------------------------|---------------------------------------------------------|---------------------------------------------------------|-----------------------------------------------------|----------------------------------|
| m-ZrO <sub>2</sub>             | 95.4                                                    | 95.4                                                    | 0.289                                               | 9.5                              |
| 1%Ru/m-ZrO <sub>2</sub>        | 90.4                                                    | 94.1                                                    | 0.267                                               | 9.3                              |
| 0.5%Na-1%Ru/m-ZrO <sub>2</sub> | 87.5                                                    | 91.2 - 93.0                                             | 0.255                                               | 9.2                              |
| 1.0%Na-1%Ru/m-ZrO <sub>2</sub> | 81.6                                                    | 88.2 - 91.9                                             | 0.252                                               | 9.1                              |
| 1.8%Na-1%Ru/m-ZrO <sub>2</sub> | 73.3                                                    | 83.5 - 90.2                                             | 0.231                                               | 9.2                              |
| 2.5%Na-1%Ru/m-ZrO <sub>2</sub> | 67.0                                                    | 79.3 - 88.6                                             | 0.211                                               | 9.3                              |
| 5.0%Na-1%Ru/m-ZrO <sub>2</sub> | 44.7                                                    | 64.5 - 83.1                                             | 0.148                                               | 10.1                             |

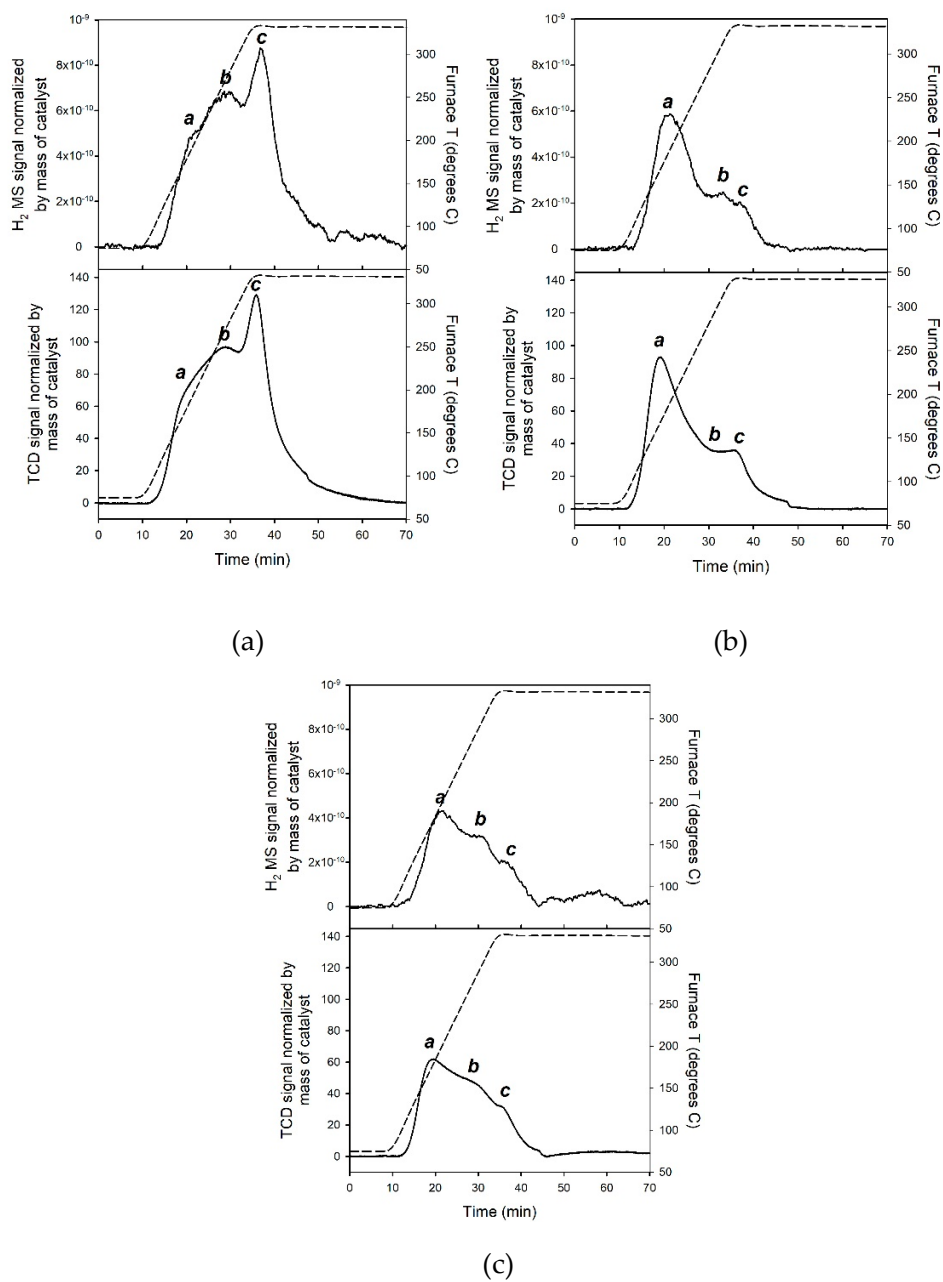

**Figure S1:** Results of hydrogen TPD for (a) 1%Ru/m-zirconia, (b) 2.5%Na-1%Ru/m-zirconia, and (c) 5%Na-1%Ru/m-zirconia. Peaks *a*, *b*, and *c* represent active sites of increasing chemisorption strength.

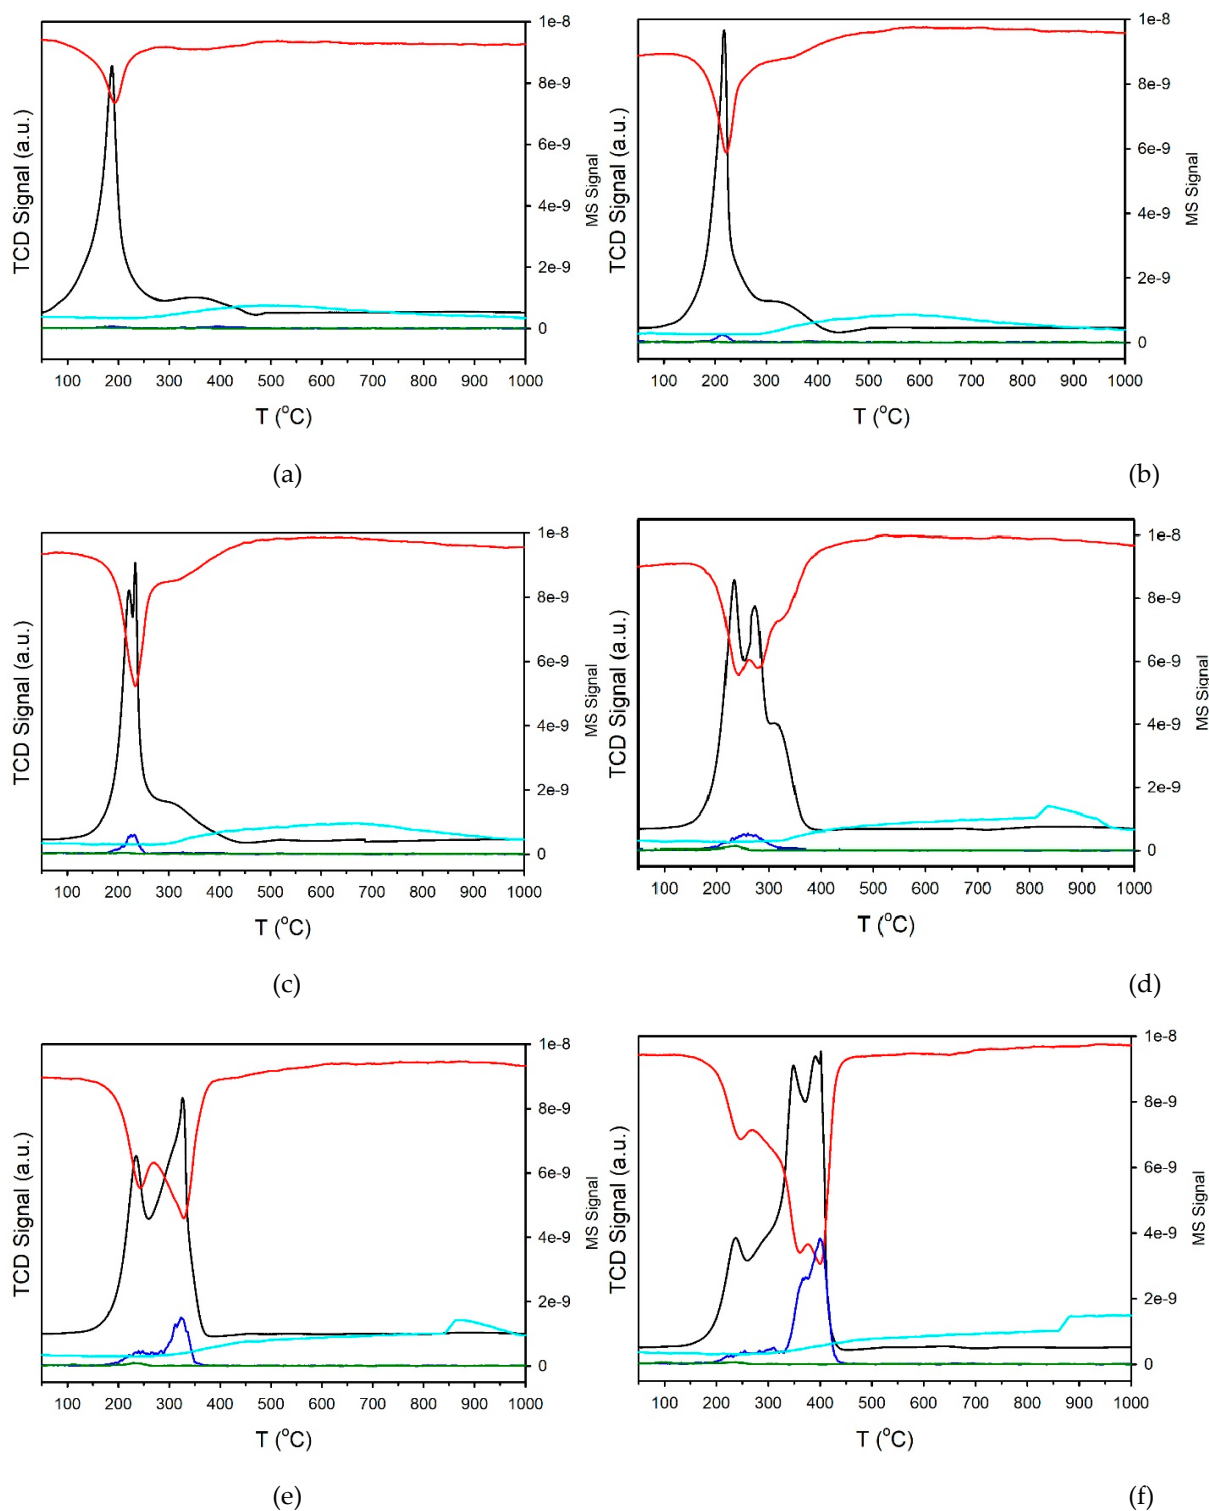

**Figure S2:** Hydrogen-TPR/ TPR-MS for (a) unpromoted 1%Ru/m-zirconia and the promoted catalyst with sodium loadings of (b) 0.5%, (c) 1%, (d) 1.8%, (e) 2.5%, and (f) 5%, including (black) TCD signal, and MS data for (red) hydrogen, (cyan) water, (blue) carbon monoxide, and (green) carbon dioxide.

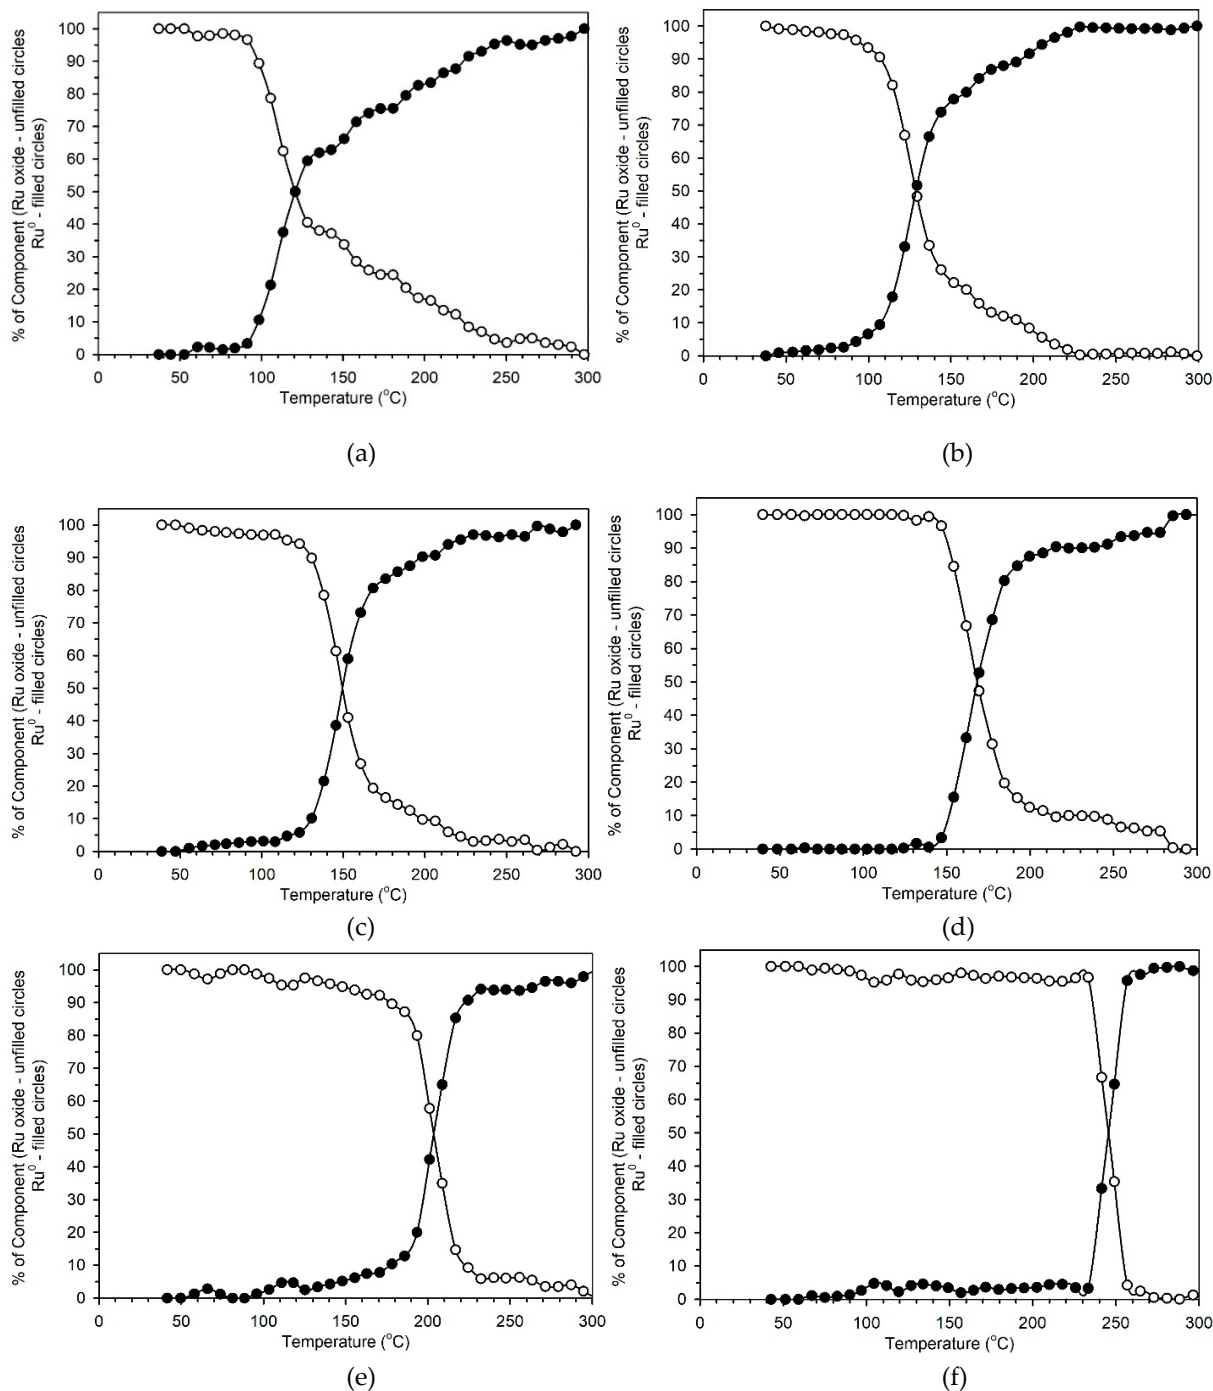

**Figure S3:** Linear combination fittings of TPR-XANES spectra recorded at the Ru K edge as a function of temperature for (a) unpromoted 1%Ru/m-zirconia catalyst and promoted catalysts with Na loadings of (b) 0.5%, (c) 1.0%, (d) 1.8%, (e) 2.5%, and (f) 5%, including (unfilled circles) ruthenium oxide and (filled circles) ruthenium metal. The point of 50% conversion from ruthenium oxide to ruthenium metal occurs at (a) 121°C, (b) 129°C, (c) 149°C, (d) 168°C, (e) 203°C, and (f) 246°C.

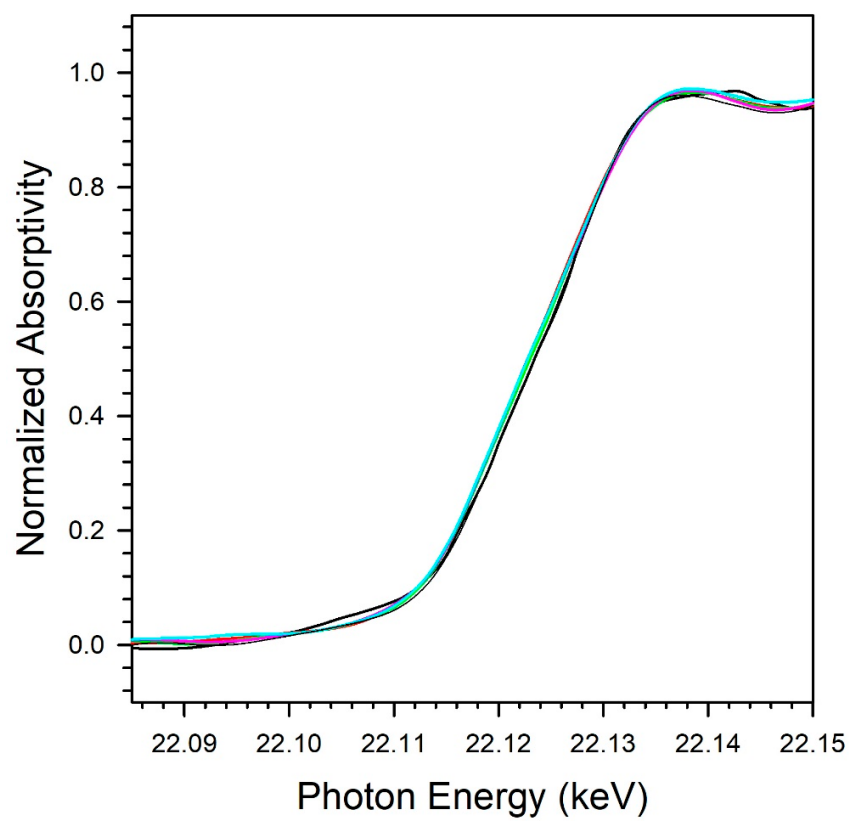

**Figure S4:** XANES overlays following H<sub>2</sub>-TPR.

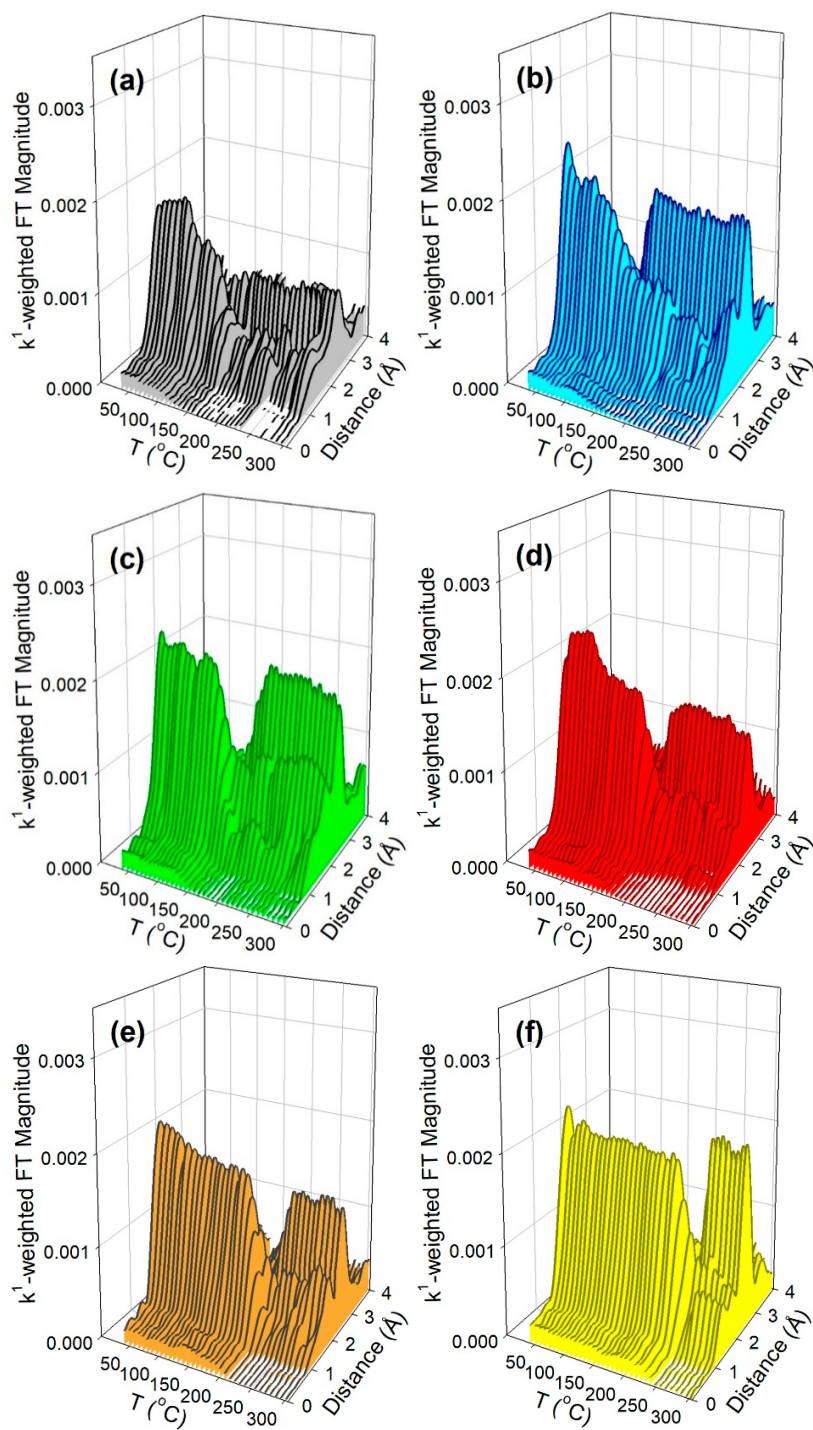

**Figure S5:** TPR-EXAFS Fourier transform magnitude spectra recorded near the Ru K edge as a function of temperature for (a, gray) unpromoted 1%Ru/m-zirconia and promoted catalysts having Na loadings of (b, cyan) 0.5%, (c, green) 1.0%, (d, red) 1.8%, (e, orange) 2.5%, and (f, yellow) 5%.

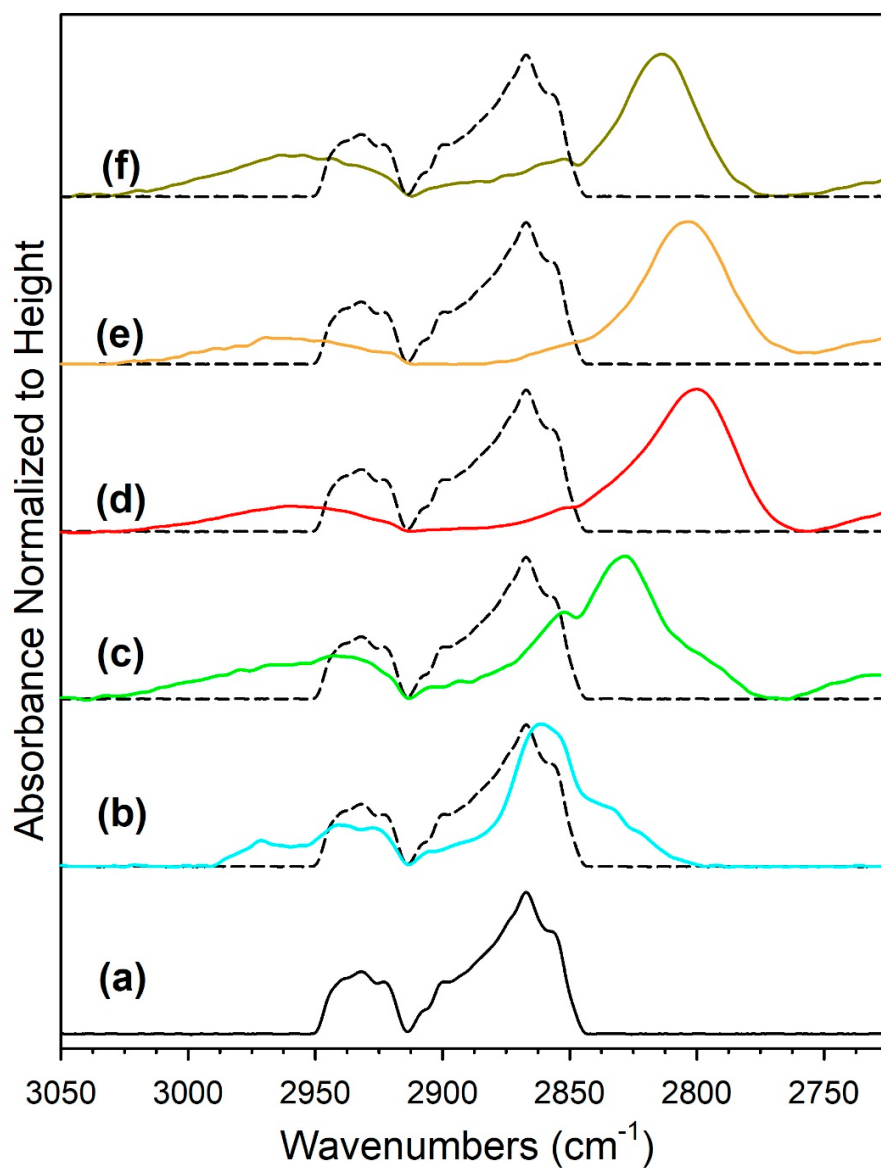

**Figure S6:** DRIFTS of formate  $\nu(\text{CH})$  band following CO adsorption at 225 °C (and cooling to 130 °C) to react with defect-associated OH groups produced over catalysts reduced at 300 °C in  $\text{H}_2$  and steamed at 225 °C (followed by  $\text{H}_2$  and He purges at 225 °C), including (a) unpromoted 1%Ru/m-zirconia, and the promoted catalysts having Na loadings of (b) 0.5%, (c) 1%, (d) 1.8%, (e) 2.5%, and (f) 5%.

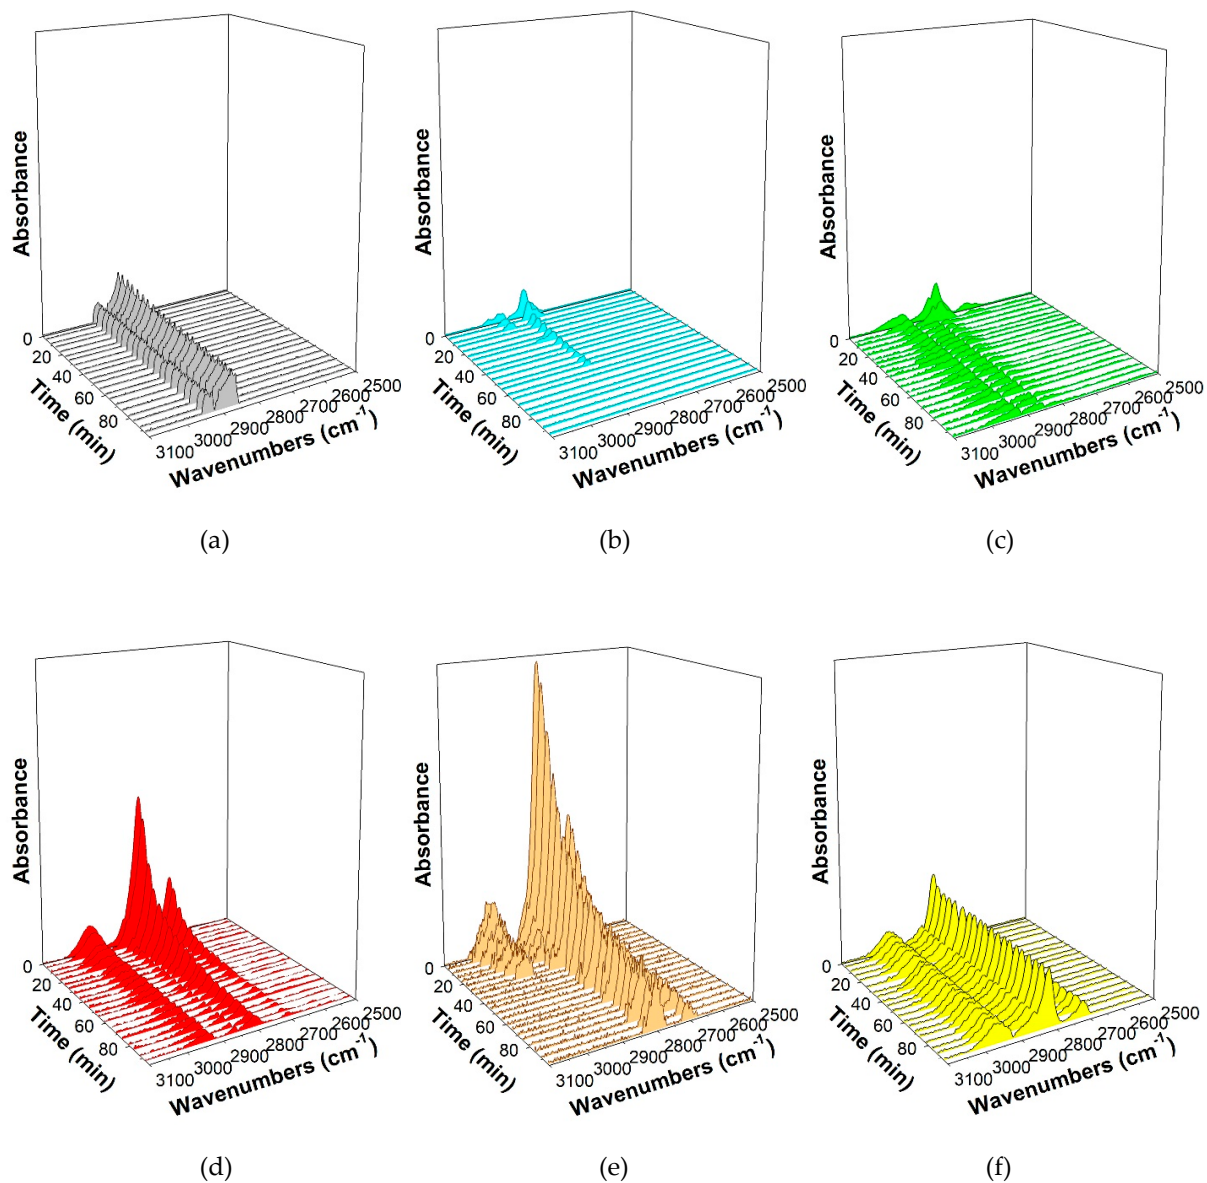

**Figure S7:** Forward formate decomposition in 75 mL/min of 4.4% $\text{H}_2\text{O}$  in helium at 130°C for (a) unpromoted 1%Ru/m-zirconia, and the promoted catalysts having Na loadings of (b) 0.5%, (c) 1%, (d) 1.8%, (e) 2.5%, and (f) 5%.

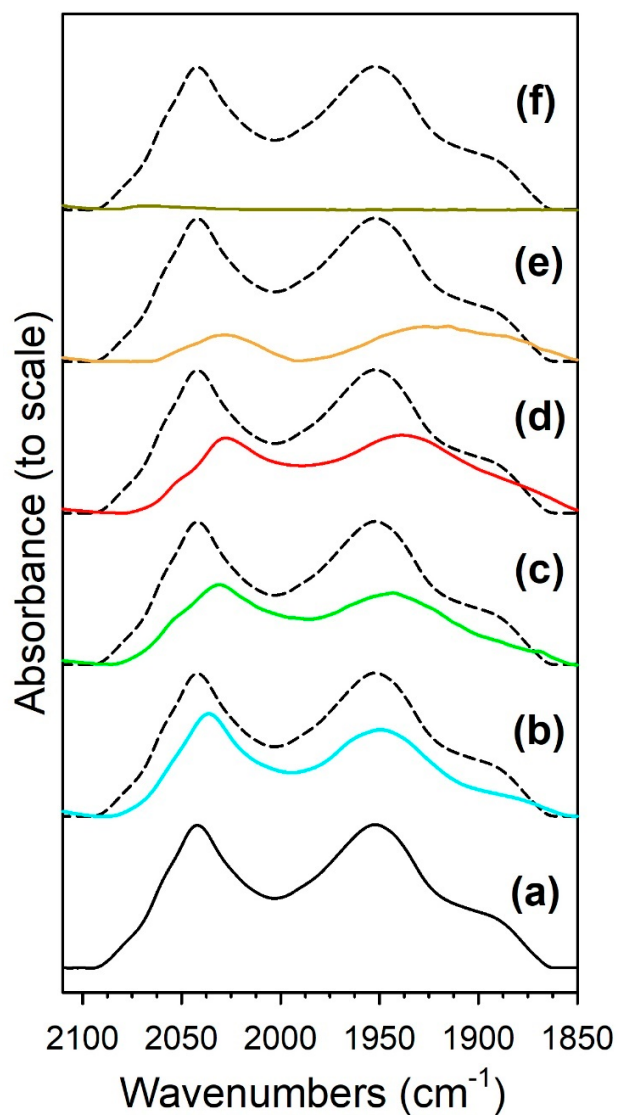

**Figure S8:** Effect of Na on attenuating the Ru carbonyl  $\nu(\text{CO})$  band intensity following CO adsorption at 225 °C (and cooling to 130 °C) over catalysts reduced at 300 °C in  $\text{H}_2$  and steamed at 225 °C (followed by  $\text{H}_2$  and He purges at 225 °C), including (a) unpromoted 1%Ru/m-zirconia, and the promoted catalysts having Na loadings of (b) 0.5%, (c) 1%, (d) 1.8%, (e) 2.5%, and (f) 5%.

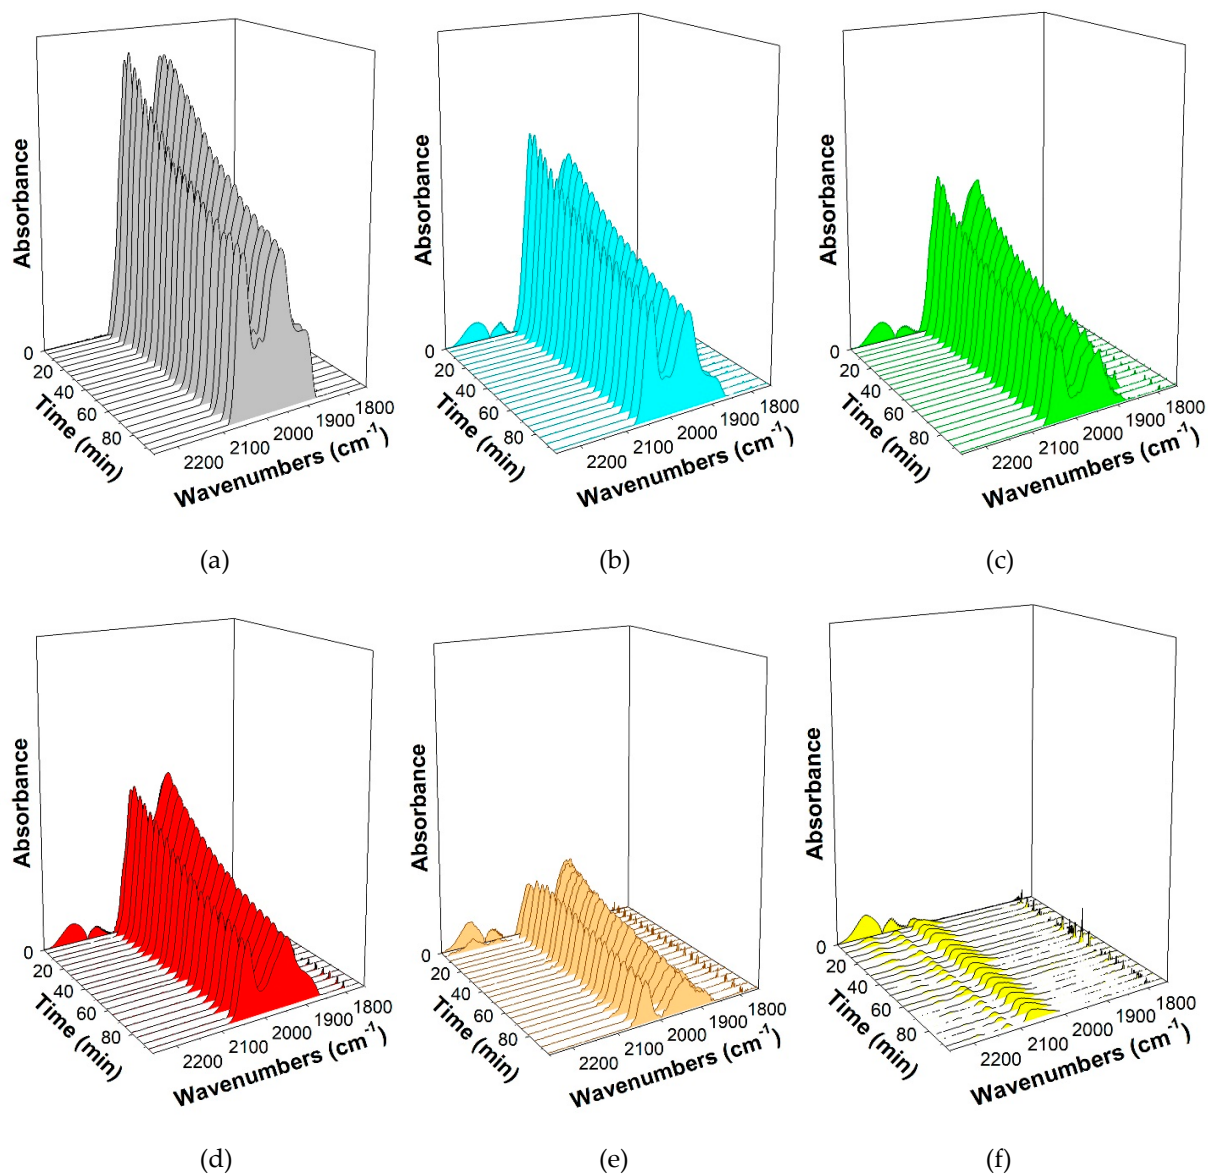

**Figure S9:** Ru-carbonyl decomposition in 75 mL/min of 4.4% H<sub>2</sub>O in helium at 130°C for (a) unpromoted 1% Ru/m-zirconia, and the promoted catalysts having Na loadings of (b) 0.5%, (c) 1%, (d) 1.8%, (e) 2.5%, and (f) 5%.

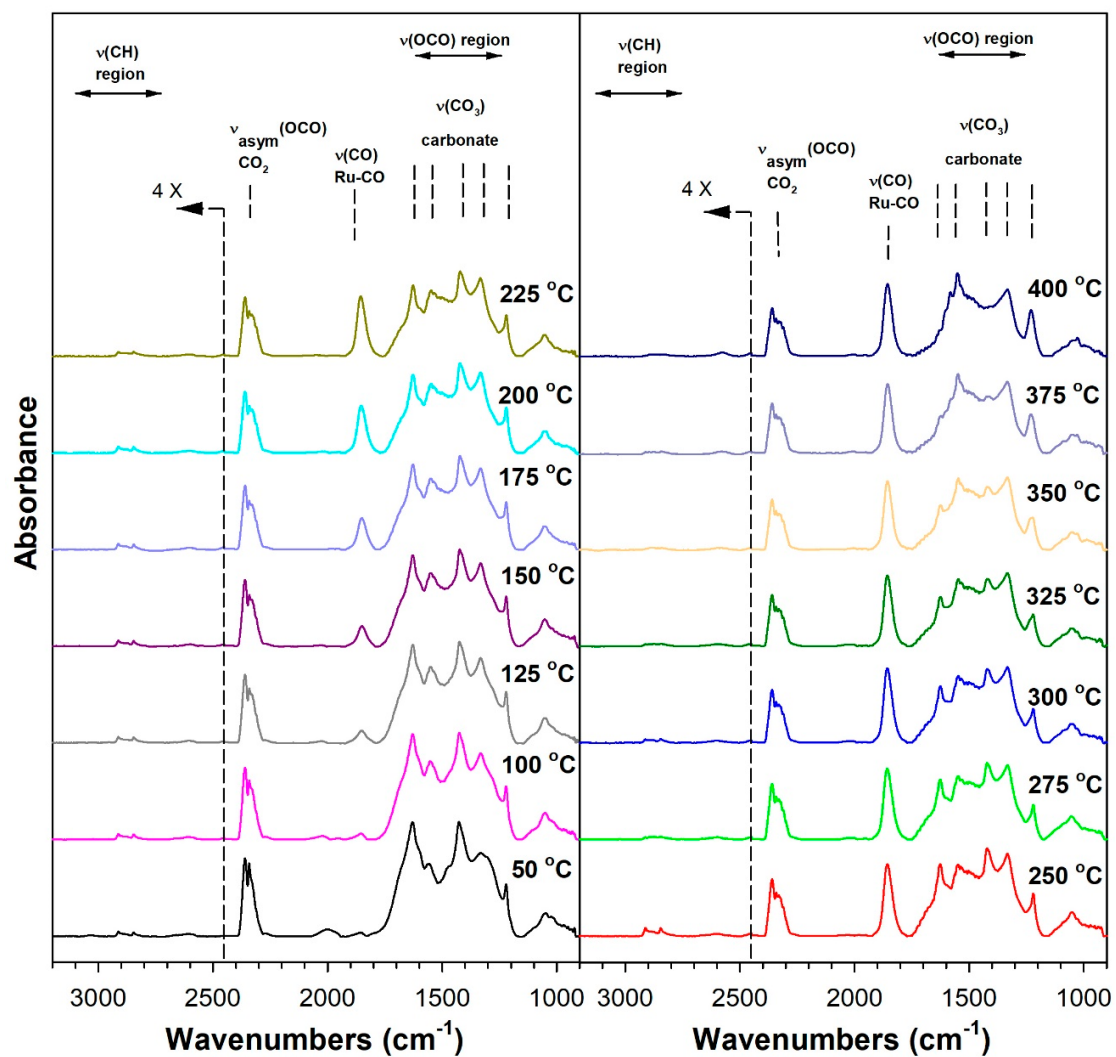

**Figure S10:** DRIFTS of 4%CO<sub>2</sub> (balance He) for unpromoted 1%Ru/m-zirconia reduced at 300°C in H<sub>2</sub>, purged in He, and then cooled to 50 °C prior to CO<sub>2</sub> adsorption.

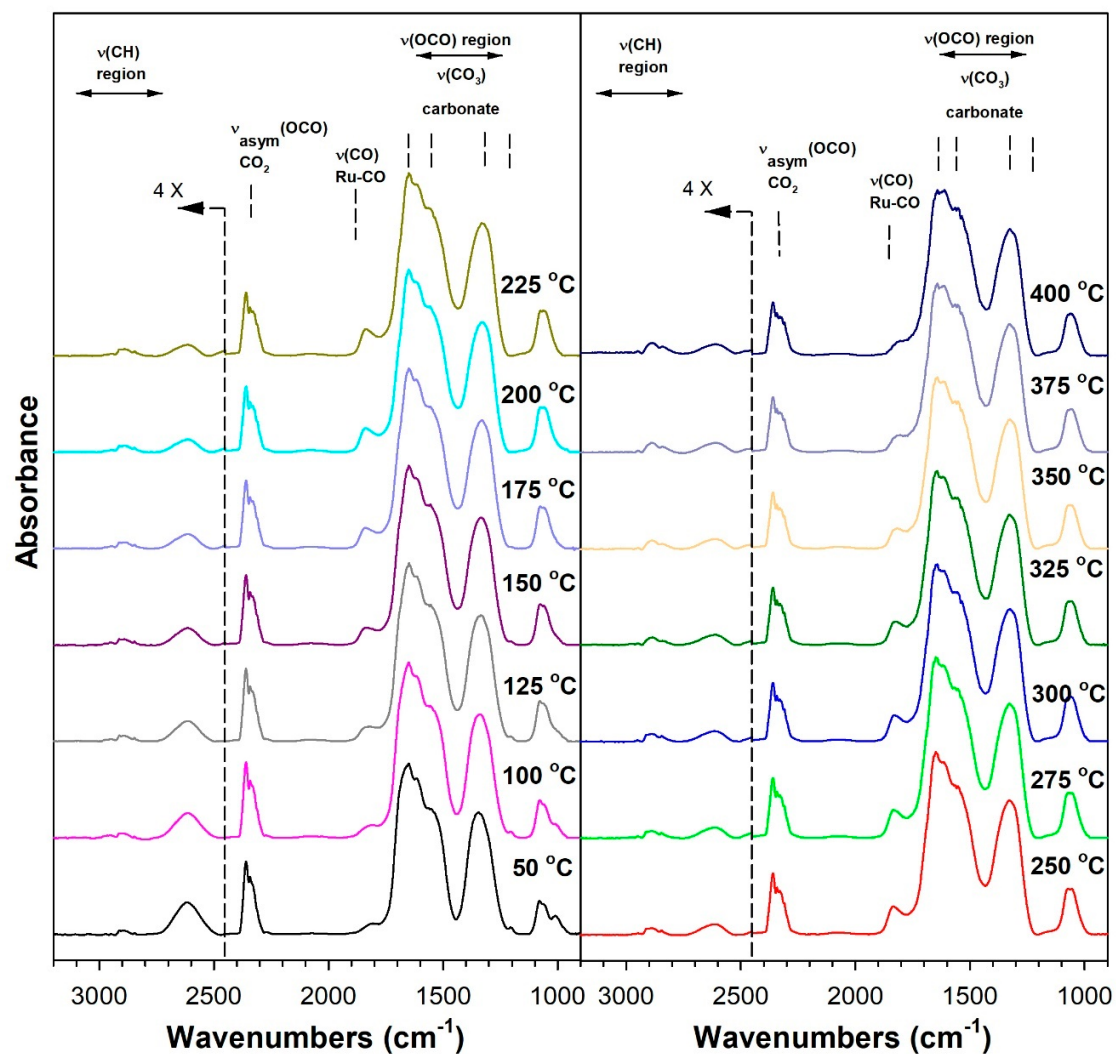

**Figure S11:** DRIFTS of 4% $\text{CO}_2$  (balance He) for 2.5%Na-1%Ru/m-zirconia reduced at 300°C in  $\text{H}_2$ , purged in He, and then cooled to 50°C prior to  $\text{CO}_2$  adsorption.
